1 Translocation of dense granule effectors across the parasitophorous vacuole membrane in  
2 *Toxoplasma*-infected cells requires the activity of ROP17, a rhoptry protein kinase.

3

4 Michael W. Panas<sup>1</sup>, Abel Ferrel<sup>1</sup>, Adit Naor<sup>1</sup>, Elizabeth Tenborg<sup>1,3</sup>, Hernan A. Lorenzi<sup>2</sup> and John C.  
5 Boothroyd<sup>1\*</sup>

6

7 <sup>1</sup>Department of Microbiology and Immunology

8 299 Campus Drive

9 Stanford School of Medicine

10 Stanford CA 94305-5124

11

12 <sup>2</sup>Department of Infectious Diseases

13 J. Craig Venter Institute

14 Rockville MD 20850

15

16 <sup>3</sup>University of California at Davis

17 School of Veterinary Medicine

18 1 Garrod Drive

19 Davis CA 95616

20

21 \*Corresponding author:

22 Phone: 650-723-7984

23 Fax: 650-725-6757

24 Email: [jboothr@stanford.edu](mailto:jboothr@stanford.edu)



## 26 **Abstract**

27 *Toxoplasma gondii* tachyzoites co-opt host cell functions through introduction of a large set  
28 of rhoptry- and dense granule-derived effector proteins. These effectors reach the host cytosol  
29 through different means: direct injection for rhoptry effectors and translocation across the  
30 parasitophorous vacuolar membrane (PVM) for dense granule (GRA) effectors. The machinery that  
31 translocates these GRA effectors has recently been partially elucidated, revealing 3 components,  
32 MYR1, MYR2 and MYR3. To determine if other proteins might be involved, we returned to a library  
33 of mutants defective in GRA translocation and selected one with a partial defect, suggesting it might  
34 be in a gene encoding a new component of the machinery. Surprisingly, whole-genome sequencing  
35 revealed a missense mutation in a gene encoding a known rhoptry protein, a serine/threonine  
36 protein kinase known as ROP17. ROP17 resides on the host-cytosol side of the PVM in infected cells  
37 and has previously been known for its activity in phosphorylating and, thereby, inactivating host  
38 immunity-related GTPases. Here, we show that null or catalytically dead mutants of ROP17 are  
39 defective in GRA translocation across the PVM, but that translocation can be rescued “in *trans*” by  
40 ROP17 delivered by other tachyzoites infecting the same host cell. This strongly argues that  
41 ROP17’s role in regulating GRA translocation is carried out on the host-cytosolic side of the PVM,  
42 not within the parasites or lumen of the parasitophorous vacuole. This represents an entirely new  
43 way in which the different secretory compartments of *Toxoplasma* tachyzoites collaborate to  
44 modulate the host-parasite interaction.

45

46 **Importance**

47

48           When *Toxoplasma* infects a cell it establishes a protective parasitophorous vacuole  
49 surrounding it. While this vacuole provides protection, it also serves as a barrier to the export of  
50 parasite effector proteins that impact and take control of the host cell. Our discovery here that the  
51 parasite rhoptry protein, ROP17, is necessary for export of these effector proteins provides a  
52 distinct, novel function for ROP17 apart from its known role in protecting the vacuole. This will  
53 enable future research into ways in which we can prevent the export of effector proteins thereby  
54 preventing *Toxoplasma* from productively infecting its animal and human hosts.

55

## 56 **Introduction**

57 *Toxoplasma gondii* is an obligate intracellular parasite capable of infecting a wide range of  
58 cell types in almost any warm-blooded animal. As for most *Apicomplexa*, entry into a host cell and  
59 interaction with host functions once inside involves the coordinated action of at least three distinct  
60 secretory compartments: micronemes, rhoptries and dense granules [1]. The small, apical  
61 micronemes are the first to function in invasion, releasing adhesins onto the surface of the parasite  
62 that are crucial for attachment to the host cell [2,3]. The much larger, bulb-shaped rhoptries are  
63 also apically located and these somehow directly introduce their contents into the host cell at the  
64 start of actual invasion [4]. Once initiated, invasion involves an invagination of the host plasma  
65 membrane to form a parasitophorous vacuole (PV). This process is mediated by binding between a  
66 surface-localized micronemal protein, AMA1, and RON2, a protein that starts in the rhoptry necks  
67 (hence “RON”) but is introduced into the host cell to become an integral membrane protein within  
68 the host plasma membrane [5-7].

69 In addition to the RON proteins, rhoptries also introduce the contents of their bulbs during  
70 invasion [8,9]. These proteins, generally known as ROPs, are a set of effectors whose job generally  
71 appears to be to co-opt host functions [4,10-12]. Most known ROPs are members of an extended  
72 family of protein kinases and pseudokinases defined by their homology to the prototypical member  
73 of the family, ROP2 [13]. Among the active ROP2-like kinases are ROP17 and ROP18 which have  
74 been well studied for their role in defense against immunity-related GTPases, a set of host proteins  
75 that are generated in response to interferon-gamma and that attack the parasitophorous vacuole  
76 membrane (PVM) resulting in eventual death of the parasites inside [14-17]. In collaboration with  
77 the pseudokinase ROP5, ROP17 and ROP18 phosphorylate IRGs which disrupts their ability to bind  
78 GTP, thereby neutralizing their ability to attack the PVM [18-21]. The location of these ROPs at the  
79 PVM [22,23], specifically on the host-cytosolic side of this membrane [24], perfectly positions them

80 for their role in defending against IRG attack. In addition, ROP17 has been shown to impact the host  
81 transcriptional network directly by as yet unknown means [25] and to be essential for full virulence  
82 in mice [26].

83 A third secretory compartment, the dense granules, also plays a key function in the  
84 interaction with the host cell. The contents of these spherical organelles are known as GRAs and  
85 they are released into the PV after invasion is underway [27]. Unlike rhoptry proteins, however,  
86 GRAs are not injected directly into the host cytosol but instead are secreted into the PV space [28-  
87 30]. Some GRA proteins are involved in elaboration of the PVM into a complex network of  
88 nanotubes known as the intravacuolar network [31,32]. Others associate with or even integrate  
89 into the PVM where they mediate a variety of host functions including recruitment of host  
90 mitochondria [33] and activation of host NF $\kappa$ B [34]. A third set of GRA proteins including GRA16,  
91 GRA18, GRA24, and TgIST, however, are translocated across the PVM and into the host cytosol, with  
92 some eventually reaching the host nucleus where they have a profound effect on many host  
93 functions [11,35]. This class of GRA proteins impact the activity of host p53 [36] p38 MAPKinase  
94 [37], STAT1 signaling [38,39], beta-catenin signaling [40], E2F signaling [41], and c-Myc expression  
95 [42].

96 Using a genetic screen for *Toxoplasma* genes necessary for the aforementioned host c-Myc  
97 upregulation, we have previously demonstrated that the translocation of GRAs across the PVM  
98 involves a set of parasite proteins that originate in dense granules or dense-granule-like organelles,  
99 ultimately reaching the PVM [42,43]. These MYR (Myc Regulation) genes were identified by using  
100 fluorescence-activated cell sorting (FACS) to select from a population of chemically mutagenized  
101 *Toxoplasma* tachyzoites those mutants that fail to upregulate a GFP-c-Myc reporter fusion in bone  
102 marrow macrophages. Whole-genome sequencing of clones from the resulting populations of  
103 *Toxoplasma* mutants revealed three novel genes as necessary for the c-Myc upregulation, *MYR1*,

104 *MYR2* and *MYR3* [42,43]. *MYR1* and *MYR3* form a stable complex at the PVM [43] and it is presumed  
105 that these two proteins are part of a translocon system that mediates the movement of GRAs across  
106 this membrane. *MYR2* is also at the periphery of the PV but it has not yet been found to associate  
107 with either of the other two MYR proteins. Deletion of any one of the three *MYR* genes results in a  
108 complete loss of GRA translocation and, as expected for a mutant that cannot introduce an entire  
109 class of crucial effector proteins,  $\Delta myr1$  strains have a much-reduced impact on the host  
110 transcriptome [41]; they are also substantially attenuated in a mouse model of virulence [42].

111 *A priori*, it seemed likely that more than just these three proteins would be necessary for the  
112 translocation of GRA effectors across the PVM. To address this possibility, we returned to the  
113 original library of Myr-mutants [42] and asked if any of the mutants had a partial defect which  
114 might indicate that they were defective in a gene other than *MYR1/2/3*. We report here the isolation  
115 of one such mutant which was found to have a missense mutation in *ROP17* and go on to show that  
116 a functional *ROP17* within the host cell is indeed necessary for the translocation of GRA proteins  
117 across the PVM, indicating that a rhoptry-derived kinase located at the PVM plays an unanticipated  
118 role in this crucial process.

119

## 120 **Results**

121 We previously reported the use of a forward genetic screen to identify *Toxoplasma* genes  
122 necessary for the upregulation of mouse c-Myc expression [42]. This led to the identification of  
123 *MYR1*, *MYR2* and *MYR3*, mutants for all of which show a complete loss of GRA16- or GRA24-  
124 translocation across the PVM [42,43]. To determine if other genes might be involved, we returned  
125 to the mutant libraries and screened them for a different phenotype, *partial* loss of effector  
126 translocation. This was done by isolating 42 individual clones from the two libraries and assessing  
127 their ability to translocate HA-tagged GRA16 and MYC-tagged GRA24 to the host cell nucleus in

128 infected human foreskin fibroblasts (HFFs). Most of the mutants obtained showed an essentially  
129 total loss of such translocation but one, clone MFM1.15, showed an intermediate phenotype (Fig.  
130 1A, B).

131 The partial phenotype of MFM1.15 suggested that it might harbor a mutation partially  
132 inactivating a gene necessary for translocation, e.g. one of the *MYR* genes, or else it might harbor a  
133 mutation completely ablating expression of a novel gene that is only partly necessary for  
134 translocation and the c-Myc induction. To resolve this, we first used Sanger sequencing to confirm  
135 there was no mutation in the *MYR1*, *MYR2* or *MYR3* loci, and then subjected the clone to whole  
136 genome sequence analysis and identified the 11 mutations shown in Fig. 1C (upper panel). None of  
137 these mutations were in a known *MYR* gene but one stood out as being a missense mutation in a  
138 gene encoding a known protein kinase present at the PVM, ROP17. This raised the tantalizing  
139 possibility that ROP17 might play a role in the translocation of GRA proteins across the PVM.  
140 Consistent with this, we returned to previous datasets and saw that a nonsense mutation in *ROP17*  
141 had also been seen in one of the original screens that yielded MYR1 [42]. In this latter instance, the  
142 supposed “clone” that was sequenced, MFM2.1, turned out actually to be a pair of clones, such that  
143 all the mutations detected were present in only about 50% of the sequence reads. One of these  
144 mutations was in a gene that was mutated in two other (true) clones analyzed in the same set and  
145 so this gene was pursued and eventually shown to be essential for c-Myc upregulation and was thus  
146 designated *MYR1*. At the time, we did not know which of the other mutations detected were random  
147 “hitch-hiker” mutations in the *myr1* mutant vs. which might be key to the phenotype in the other  
148 clone present in the MFM2.1 pair. To resolve this, we recloned MFM2.1 parasites by limiting  
149 dilution and searched for mutants that had a wild type MYR1 gene. One of these was fully genome  
150 sequenced and the result was mutant MFM2.1.b which was found to have the ROP17 S151\*



151 mutation, consistent with a defect in ROP17 being the defect that produced the Myr<sup>-</sup> phenotype  
152 (Fig. 1C, lower panel).

153 The finding that *ROP17* is mutated in both MFM1.15 and MFM2.1.b strongly suggested that a  
154 functional ROP17 protein might be necessary for the c-Myc upregulation. To test this, we generated  
155 a knock-out of *ROP17* in an otherwise wild-type *Toxoplasma* by disrupting the open reading frame  
156 of *ROP17* (*TGGT1\_258580*) with insertion of the *HXGPRT* gene (Fig. 2A), confirming this disruption  
157 by PCR of the locus (Fig. 2B), and assessing the translocation of known effectors in HFF cells  
158 infected with the resulting mutant. Preliminary results indicated that disruption of *ROP17* does  
159 indeed prevent the parasite from exporting GRA16HA and GRA24MYC from the parasitophorous  
160 vacuole into the host nucleus when these constructs were transiently expressed in RH $\Delta$ *rop17*  
161 tachyzoites (Fig 2C).

162 To confirm the importance of ROP17, we generated a complemented  $\Delta$ *rop17* mutant in  
163 which a triple HA-tagged version of ROP17 is expressed off an introduced transgene (Fig. 3A).  
164 Within the parasite, ROP17HA colocalized with ROP2/3/4 at the apical end of the parasite (Fig. 3B),  
165 supporting proper localization of the tagged protein. As our previous results suggested ROP17 may  
166 be playing a critical role in the export of MYR-dependent proteins, we used the host c-Myc  
167 regulation phenotype as a readout of successful complementation. The results (Fig. 3C) showed that  
168 cells infected with the  $\Delta$ *rop17* mutants show only background levels of c-Myc in the nuclei of  
169 infected cells whereas cells infected with wild type and the complemented mutant show robust c-  
170 Myc expression (confirmation and quantification of these results are presented further below).  
171 These results thereby confirm that ROP17 is indeed necessary for host c-Myc upregulation by  
172 *Toxoplasma* tachyzoites, and in combination with the defect of translocation of GRA16 and GRA24  
173 this strongly suggests that ROP17 is a previously unknown player in the process whereby GRA  
174 proteins cross the PVM.

175 Even though ROP17 is a well-studied serine/threonine protein kinase, it is possible that its  
176 role in protein translocation at the PVM is as a scaffolding protein rather than as an active kinase.  
177 To test this, we made three different versions of ROP17, each with a mutation to alanine in one of  
178 three residues known to be essential for catalysis [44-46], i.e., K312A, D436A and D454A (Fig. 4A).  
179 These mutated versions were introduced into the  $\Delta rop17$  mutant where they showed the expected  
180 colocalization with ROP2/3/4 in puncta at the apical end (Figure 4B). To determine if the mutant  
181 ROP17s reached the PVM after invasion, we applied previously established conditions for partially  
182 permeabilizing infected host cells such that antibodies can reach only the PVM, not the parasites  
183 within [47]. This showed that, indeed, in cells where the control antibody (anti-SAG1) fails to detect  
184 the parasites within the PVM, anti-ROP17 efficiently stains the PVM showing that the mutant  
185 ROP17s do successfully enter the host cell and traffic to this location (Fig. 4C).

186 We next sought to determine if the ectopic expression of the wild type ROP17 gene and/or  
187 the mutant versions could complement the phenotypes we have observed in the ROP17-disrupted  
188 strains. When we assessed protein translocation of GRA24MYC, we observed translocation into the  
189 nucleus of ~89% of cells infected with GRA24MYC-expressing wild type parasites whereas cells  
190 infected with GRA24MYC-expressing  $RH\Delta rop17$  parasites showed no such translocation (Fig. 5A).  
191 The loss of GRA24 translocation was successfully rescued when the  $RH\Delta rop17$  parasites were  
192 complemented with a fully functional ROP17 but not with any of the point mutant versions of  
193 ROP17 (Fig. 5A). When we assessed c-Myc upregulation, a host phenotype associated with the  
194 translocation of MYR1-dependent effectors, we observed a similar result; c-Myc was upregulated in  
195 >90% of the nuclei of host cells infected with wild type RH and  $RH\Delta rop17::ROP17HA$  parasites, but  
196 in <20% of the nuclei of host cells infected with  $RH\Delta rop17$  or any of the three versions  
197 complemented with a mutation altering the trio of catalytic residues (Fig 5B, C). These results

198 strongly suggest that ROP17's kinase activity is necessary for its role in GRA translocation across  
199 the PVM.

200         Given that ROP17 ends up at the PVM in infected cells and given that this is where the known  
201 GRA translocation machinery (e.g., MYR1/2/3) is located, it seemed most likely that this is where  
202 ROP17 functions to assist in the translocation of GRA proteins. To test this directly, we took  
203 advantage of the fact that when a tachyzoite infects a cell, the ROP proteins that are injected can  
204 associate either with the PVM of that parasite or with the PVM surrounding other parasites that are  
205 also present within that cell [48]. Thus, we created a reporter parasite line that lacked ROP17  
206 expression but was stably expressing GRA24MYC; translocation of GRA24MYC in this strain should  
207 be blocked at the PV unless ROP17 can be provided in *trans*. We then infected cultures with these  
208 RH $\Delta$ rop17::GRA24MYC parasites, followed an hour later with RH $\Delta$ myr1 parasites expressing  
209 mCherry to distinguish them from the nonfluorescent RH $\Delta$ rop17::GRA24MYC line ("Condition 1",  
210 Fig. 6A). In case the order of infection was important, we also did this experiment where we  
211 inverted the order that the two strains were added to the monolayers; i.e., we initiated the  
212 infections with the RH $\Delta$ myr1 mCherry line, followed an hour later by infection with the  
213 nonfluorescent RH $\Delta$ rop17::GRA24MYC ("Condition 2," Figure 6A). In both cases, we assessed  
214 GRA24MYC translocation in infected cells after a further 17 hours, scoring cells that were infected  
215 with either of the mutants alone or those co-infected with both. The prediction was that if ROP17's  
216 role in GRA translocation is on the host-cytosolic side of the PVM, then the  $\Delta$ myr1 line would  
217 provide a functional ROP17 that could act in *trans* on the translocation machinery expressed by the  
218  $\Delta$ rop17 parasites, whereas cells infected with either strain alone would not exhibit translocation. As  
219 shown in Figure 6B, this was indeed the result obtained; cells infected with either mutant alone  
220 showed no GRA24MYC in the host nucleus, whereas ~20-22% of co-infected cells did show  
221 translocation, regardless of the order that the two strains were added to the cultures. These results

222 strongly argue that the action of ROP17 can be provided in *trans* and is needed within the host  
223 cytosol, not within the parasites or within the PV space since proteins are not known to be able to  
224 traffic across the PVM from host to PV or parasite (except to the lysosome for digestion [49]).

225         The data presented so far show that ROP17 is necessary for the translocation of at least two  
226 GRA proteins from the PV to the host nucleus. To determine if this is true of essentially all dense  
227 granule effectors that end up in the host cell, we performed RNASeq analysis on HFFs infected with  
228 RH wild type vs. RH $\Delta$ *rop17* parasites at 6 hours post infection. As a control for a strain that has  
229 previously been shown by RNASeq analysis to be defective in the translocation of seemingly all  
230 soluble GRA effectors [41], we used a  $\Delta$ *myr1* strain. The results showed substantial concordance  
231 between the genes modulated in a MYR1-dependent manner and a ROP17-dependent manner. This  
232 conclusion can be illustrated by Principal Component Analysis (PCA) of the host genes sets  
233 generated during infection with these strains. In Figure 7A, RNASeq data for the 8 strains analyzed  
234 are shown on the plot of the first and second principal component, and the individual genes along  
235 with their RPKM values are displayed in Supplemental Table S1. The samples infected with  
236 RH $\Delta$ *myr1* and RH $\Delta$ *rop17* cluster together closely and well apart from both mock-infected cells and  
237 RH-infected cells.

238         To further explore this similarity, genes that exhibit a 2.5-fold difference during infection  
239 with these mutants compared to infection with the wild type were grouped by Gene Set Enrichment  
240 Analysis (GSEA). First, genes that were *increased* in cells infected with the wild type parasite (RH)  
241 compared to the two mutants were analyzed by GSEA. Figure 7B shows a list of gene sets in which  
242 the FDR q-value of either the RH vs. RH $\Delta$ *myr1* or the RH vs. RH $\Delta$ *rop17* was less than  $10^{-5}$ . For each  
243 of these gene sets, both the FDR q-value of the RH vs. RH $\Delta$ *myr1* (green) and RH vs. RH $\Delta$ *rop17*  
244 (purple) is shown. Genes that were expressed 2.5-fold *lower* in cells infected with the wild type  
245 compared to either of the mutants were also analyzed by GSEA and gene sets in which either the

246 FDR q-value of RH vs. RH $\Delta$ *myr1* (green) or RH vs. RH $\Delta$ *rop17* was less than  $10^{-5}$  were plotted in  
247 Figure 7C. In both cases, almost all the gene sets that are strongly affected by the lack of *MYR1* were  
248 similarly affected by the lack of *ROP17*, although the magnitude of the effect varied somewhat.  
249 Finally, we performed a direct comparison of expression levels in cells infected with RH $\Delta$ *myr1* and  
250 cells infected with RH $\Delta$ *rop17* (instead of comparing each to the wild type-infected cells). We used  
251 GSEA to analyze genes for which expression was 2.5 fold higher or 2.5-fold lower in RH $\Delta$ *rop17*-  
252 infected cells than in RH $\Delta$ *myr1*-infected cells. The results were that in neither case was a gene set  
253 enriched with an FDR q-value of even a very relaxed threshold of  $10^{-4}$ . Hence, the absence of *ROP17*  
254 and *MYR1* appear to have similar impacts on the infected cell and thus *ROP17* appears necessary  
255 for the action of most, probably all, GRA effectors that transit across the PVM via the MYR  
256 machinery.

257

## 258 **Discussion**

259 Using a genetic screen, we have identified the rhoptry-derived serine-threonine protein  
260 kinase, *ROP17*, as required for action of most if not all GRA effectors that translocate across the  
261 PVM. Using a cellular “trans” complementation assay, we have further shown that the role of *ROP17*  
262 is within the host cytosol, not within the parasite or PV space, and that *ROP17* must be catalytically  
263 active to accomplish this role. Given its location at the PVM [13,21], where other necessary  
264 elements of the translocation machinery are present, these results strongly argue that *ROP17* acts  
265 on one or other components of this machinery on the host cytosol side. Although we cannot  
266 formally exclude the possibility that *ROP17* assists GRA effectors in their trafficking across the host  
267 cytosol, from the PVM to the host nucleus, the fact that the GRA effectors that reach the host nucleus  
268 possess a conventional nuclear-localization signal (NLS) argues against this possibility as there  
269 should be no need for any additional help in their journey. Indeed, heterologous expression of

270 GRA16 and GRA24 in uninfected cells shows results in efficient trafficking to the host nucleus,  
271 confirming that no parasite proteins are necessary for this last stage of their journey [36,37].

272         Given that ROP17 is a protein kinase, it seems most likely that its role in translocating GRA  
273 effectors is through phosphorylation of one or more key components of the translocation  
274 machinery. Phosphoproteomic analyses on cells infected with *Toxoplasma* tachyzoites revealed that  
275 many parasite proteins are phosphorylated at serine and threonine residues after their secretion  
276 from the parasite [50]. Among such proteins are the PVM-localized MYR1 and MYR3 that are known  
277 to be required for GRA translocation [42,43]. The protein kinases that mediate these  
278 phosphorylations have not yet been identified but protein phosphorylation is a well-established  
279 way to regulate protein function and so such modifications might be required for PVM-localized  
280 proteins like these to become activated for their respective roles. Efforts to determine the full  
281 machinery involved in GRA translocation across the PVM are underway and once the full  
282 complement of proteins is known, mapping of all their phosphosites and determination of which  
283 such sites are dependent on which protein kinase (e.g., ROP17 or, perhaps, ROP18, another serine-  
284 threonine kinase present at the PVM) and which of these sites must be phosphorylated for  
285 functional translocation will be an important follow-up to the work proposed here.

286         Both ROP17 and ROP18 are involved in the inactivation of immunity-related GTPases  
287 [15,16,21]. Our finding that ROP17 has at least two biological roles is similar to what has been  
288 reported for ROP18; this related ROP2-family member is involved in IRG inactivation and  
289 proteasomal degradation of ATF6beta, a host transcription factor that localizes to the host  
290 endoplasmic reticulum (which itself is adjacent to and maybe even contiguous with the PVM [51])  
291 and that is crucial to the host immune response [52]. Interestingly, it is the N-terminal region of  
292 ROP18, which lies outside the conserved kinase domain, that binds to ATF6beta but an active  
293 kinase domain is required for the inactivation, suggesting that ATF6beta is a substrate for

294 phosphorylation by ROP18 [52]. Our results add a further possible explanation for the previously  
295 reported attenuation of ROP17 mutants in a mouse model of virulence using a Type I strain [26];  
296 i.e., the decrease in virulence could be due to some combination of a weakened defense against IRGs  
297 and the defect in GRA effector translocation reported here. A major role for the latter would be  
298 consistent with the previously reported attenuation in Type I  $\Delta myr1$  strains in a similar mouse  
299 model [42].

300 The involvement of a rhoptry protein in the function of GRA proteins is a second example of  
301 “inter-organelle” collaboration, the first being the binding of micronemal AMA1 to rhoptry neck  
302 protein, RON2, during the invasion of tachyzoites into the host cell [53,54]. This second example  
303 wherein a rhoptry bulb protein, ROP17, somehow assists in the translocation of GRA proteins  
304 makes clear that these different secretory organelles are part of a complicated but concerted  
305 machinery used by the parasites to interact with the host cell they are infecting.

306 Finally, it is worth noting that the chemical mutagenesis used to generate the mutant library  
307 that yielded these *ROP17* mutants provided more information than just the fact that this protein  
308 plays an important role. By specifically looking for hypomorph mutants that showed only a partial  
309 defect we were able to identify a missense M350K mutation in ROP17 providing structure/function  
310 information, namely that this residue is important for this function of ROP17. This site is within a  
311 predicted loop region that is just N-terminal of beta-sheet 4 and well away from the active site  
312 [13,44,45]. Interestingly, this is part of a region that is highly variable between different members  
313 of the ROP2 family but is in a stretch of about 9 residues that is not present in other protein kinases  
314 [45]. This may be related to the unusual, multiple functions of these secreted kinases, perhaps in  
315 enabling them to target specific substrates at this crucial interface of host and parasite.

316

## 317 **Materials and Methods**

## 318 **Parasite culture**

319 *Toxoplasma gondii* RH $\Delta$ *hpt* [55] was used for this study. *Toxoplasma* tachyzoites were  
320 maintained by serial passage in human foreskin fibroblasts (HFFs) cultured in complete Dulbecco's  
321 Modified Eagle Medium (cDMEM) supplemented with 10% heat-inactivated fetal bovine serum  
322 (FBS), 2 mM L-glutamine, 100 U/ml penicillin and 100  $\mu$ g/ml streptomycin and grown at 37 °C in  
323 5% CO<sub>2</sub>. Infections included in this study were performed by scraping infected monolayers and  
324 lysing the host cells open using a 27-gauge needle. The released parasites were pelleted at 1500  
325 rpm for 10 min, resuspended, counted using a hemocytometer, and added to confluent HFFs at the  
326 multiplicity of infection (MOI) stated.

## 327 **Genome sequencing**

328 For whole genome sequencing on the parental RH strain (SRR2068658), MFM1.15  
329 (SRR5643318), and MFM2.1b (SRS2249312) mutants, a single Illumina PE barcoded library was  
330 prepared from tachyzoite gDNA. Libraries were then pooled into groups of nine samples and  
331 multiplex sequenced in a single lane of an Illumina HiSeq 2000 machine to generate about 3 Gb of  
332 sequencing data per sample. As the mutants were made using the Type I RH strain as the parent, the  
333 sequencing reads were first quality trimmed with trimomatic and then mapped to the reference  
334 assembly of the Type I GT1 strain (as present in ToxoDB v13.0) with *bowtie2* [56]. After removing  
335 duplicated reads with *picard* and adjusting alignments around indels with *GATK toolkit* [57], single  
336 nucleotide variants (SNVs) were called using samtools utility *mpileup* [58] requiring a minimum  
337 base coverage of 5 reads and an alternative allele frequency of at least 80% or higher. Following  
338 this, *SnpEff* [59] together with a gff3 annotation file from the reference GT1 strain (ToxoDB v13.0)  
339 were used to classify the different types of SNVs present in each mutant. Potential change-of-  
340 function SNVs that were different between any of the two mutants and both the parental and  
341 reference strains were selected for further quality control and analysis.



## 342 **Transfections**

343 All transfections were performed using the *BTX EMC600 Electroporation System* (Harvard  
344 Apparatus) or Amaxa 4D Nucleofector (Lonza) model. Tachyzoites were mechanically released in  
345 PBS, pelleted, and resuspended in solution for transfection. After transfection, parasites were  
346 allowed to infect HFFs in DMEM. Transfections with the *BTX EMC600* model were performed using  
347  $5-10 \times 10^6$  parasites and 5-10  $\mu\text{g}$  DNA in Cytomix (10 mM  $\text{KPO}_4$ , pH 7.6, 120 mM KCl, 5 mM  $\text{MgCl}_2$ ,  
348 25 mM HEPES, 2 mM EDTA, 150  $\mu\text{M}$   $\text{CaCl}_2$ ). Transfections with the Amaxa 4D model were  
349 performed using  $1-2 \times 10^6$  parasites in 20  $\mu\text{l}$  P3 solution or  $5-10 \times 10^6$  parasites in 100  $\mu\text{l}$  P3  
350 solution with 5-15  $\mu\text{g}$  DNA. Effector translocation assays were performed by transiently  
351 transfecting pHTU-GRA24MYC [43] or pGRA1-GRA16HA [43] plasmid into tachyzoites, infecting  
352 monolayers of HFFs in DMEM, and fixing monolayers with formaldehyde at 16-24 hpi.

## 353 **Immunofluorescence microscopy**

354 Infected cells grown on glass coverslips were fixed using methanol at  $-20^\circ\text{C}$  for 20 min or  
355 4% formaldehyde at room temperature (RT) for 20 min, as stated in the text. Methanol-fixed  
356 samples were washed three times for 5 min with PBS and blocked using 3% BSA in PBS for 1 hr at  
357 RT. Formaldehyde-fixed samples were rinsed once with PBS, permeabilized with 0.2% Triton-X 100  
358 (TTX-100) for 20 min, and then blocked as described above. GRA16HA (and other HA-tagged  
359 proteins) was detected using rat anti-HA antibodies (Roche) while GRA24MYC was detected using  
360 rabbit anti-MYC tag antibody 9E10 (Santa Cruz Biotechnology). This anti-MYC tag antibody does not  
361 detect host c-Myc. Host c-Myc was detected using monoclonal antibody Y69, which does not cross  
362 react with the MYC tag expressed by GRA24MYC. Primary antibodies were detected with goat  
363 polyclonal Alexa Fluor-conjugated secondary antibodies (Invitrogen). Vectashield with DAPI stain  
364 (Vector Laboratories) was used to mount the coverslips on slides. Fluorescence was detected using  
365 a LSM710 inverted confocal microscope (Zeiss) or epifluorescence microscope, as stated in the text.

366 Images were analyzed using ImageJ. All images shown for any given condition/staining in any given  
367 comparison/dataset were obtained using identical parameters.

### 368 **Quantitation of nuclear GRA24MYC**

369 To assess the amount of GRA24MYC that translocated to the nucleus following transient  
370 transfection, phase contrast, DAPI and anti-MYC tag images were taken of 10-20 fields of view  
371 containing tachyzoites-infected HFF at 20 hours PI. Phase contrast was used to define the infected  
372 cells of these images, then ImageJ was used to define the nucleus on the DAPI-stained  
373 corresponding images, and these nuclear boundaries were then quantified for the intensity of  
374 GRA24MYC intensity on the corresponding MYC-tag stained images.

### 375 **Partial Permeabilization**

376 Parasites were syringe-released using a 27g needle and used to infect HFFs for 2 hrs, at  
377 which time the cells were washed with PBS and then fixed with 4% formaldehyde at room  
378 temperature (RT) for 20 min. Formaldehyde-fixed samples were rinsed once with PBS,  
379 permeabilized with 0.02% digitonin solution for 5 min and then blocked with 3% BSA in PBS for 1  
380 hr at RT. Staining was performed with anti-HA (Roche) and anti-SAG1 (DG52) primary antibodies  
381 and polyclonal Alexa Fluor-conjugated secondary antibodies (Invitrogen). Partial permeabilization  
382 of a particular vacuole was determined by the exclusion of the SAG1 antibody.

### 383 **Gene disruption**

384 The RH $\Delta$ *rop17* strain was generated by disrupting the corresponding gene locus using  
385 CRISPR-Cas9 and selecting for integration of a linearized vector encoding hypoxanthine-guanine  
386 phosphoribosyl transferase (*HXGPRT*) using drug selection for 8 days using 25  $\mu$ g/mL  
387 mycophenolic acid (MPA) and 50  $\mu$ g/mL xanthine (XAN) for HXGPRT selection. Specifically, the  
388 pSAG1:U6-Cas9:sgUPRT vector [60] was modified by Q5 site-directed mutagenesis (NEB) to specify  
389 sgRNAs targeting *ROP17* (F2). The resulting sgRNA plasmid, dubbed pSAG1:U6-Cas9:sgROP17 (P1)

390 was transfected into the RH $\Delta$ *hpt* strain of *Toxoplasma* with pTKO2 (HXGPRT+) plasmid. The  
391 parasites were allowed to infect HFFs in 24-well plates for 24 hrs, after which the media was  
392 changed to complete DMEM supplemented with 50  $\mu$ g/ml mycophenolic acid (MPA) and 50  $\mu$ g/ml  
393 xanthine (XAN) for HXGPRT selection. The parasites were passed twice before being single cloned  
394 into 96-well plates by limiting dilution. Disruption of the gene coding regions was confirmed by PCR  
395 and sequencing of the locus.

### 396 **Ectopic gene integration**

397 The RH $\Delta$ *rop17* strain was complemented ectopically with the pGRA-ROP17-3xHA plasmid,  
398 which expresses *ROP17* off its natural promoter. To construct the pGRA-ROP17-3xHA plasmid,  
399 pGRA1<sub>plus</sub>-HPT-3xHA plasmid [43] was first digested using EcoRV-HF and NcoI (New England  
400 Biolabs) for 4 hrs at 37 °C to remove the *GRA1* promoter. Product was incubated with Antarctic  
401 phosphatase (New England Biolabs) and gel-extracted. The empty vector backbone was amplified  
402 by PCR using Herculase II polymerase (Agilent) and primers 5'-  
403 CACATTTGTGTCACCCCAAATGAGAATTCGATATCAAGCTTGATCAGCAC-3' and 5'-  
404 GAGGCGGCTTTATTACAGAAGGAGCCATGGTACCCGTACGACGTCCCG-3' with each having 23 and 24  
405 base pair overhangs to *ROP17*, respectively. The *ROP17* promoter and open reading frame were  
406 amplified from RH $\Delta$ *hpt* genomic DNA and using 5'-  
407 GTGCTGATCAAGCTTGATATCGAATTCTCATTTGGGGTGACACAAATGTG-3' and 5'-  
408 CGGGACGTCGTACGGGTACCATGGCTCCTTCTGTAATAAAGCCGCCTC-3' primers, each containing 27  
409 or 24 base pair overhangs to the pGRA1<sub>plus</sub>-HPT-3xHA plasmid backbone, respectively. Amplified  
410 backbone and *ROP17* were then assembled using the Gibson assembly master mix (New England  
411 Biolabs). ElectroMAX DH10B *E. coli* (Invitrogen) were subsequently transformed and plated to  
412 obtain single colonies of successfully assembled pGRA1-ROP17-3xHA plasmid. *ROP17* integration

413 was verified by PCR and sequencing using primers 5'-CACTGATCGGCTTTGTAGACTT-3' and 5'-  
414 CGCGCACGGCAGTCAGATAA-3'.

415 To complement RH $\Delta$ *rop17* $\Delta$ *hpt* parasites with wildtype *ROP17*, the pGRA1-ROP17-3xHA  
416 plasmid construct described previously was transfected to generate an RH $\Delta$ *rop17*::*ROP17*  
417 population. This population was selected by MPA/XAN as previously described. The resulting  
418 population was then cloned by limiting dilution and tested for ROP17-3xHA expression by Western  
419 blot and IFA.

420 To generate RH and RH $\Delta$ *rop17* parasite lines ectopically expressing GRA24MYC, pHTU-  
421 GRA24-3xMYC was transfected into each strain and selected using MPA/XAN as described above for  
422 6 days.

### 423 **Site-specific mutation**

424 Site-specific point mutation of the pGRA-ROP17-3xHA plasmid was performed by creating  
425 primers 5'- GCGATATTTGTTCAACGGGTGTTGAGCAAT-3' and 5'-  
426 CAGCGGAATGGTTGCCCTGTGGTGGG-3', 5'-GCTGTGAAACTGCAAATTTTCTTGTTGAT-3' and 5'-  
427 GCCATGAACAAGTCCGAACGCGTGGAA-3', and 5'-GcCTTCACTCAAATTCTTCGTACGAATG-3' and 5'-  
428 AGAAAGTAGAAGCAATCCGATTTATC-3' to mutate residues 312, 436, and 454, respectively, to an  
429 alanine codon within the *ROP17* open reading frame. The "Round-the-horn" site-directed  
430 mutagenesis approach was used to introduce point mutations at the aforementioned residues using  
431 the ROP17-3xHA plasmid. The PCR products were then individually ligated using a KLD Enzyme  
432 reaction kit (New England Biolabs) for 3 hours and subsequently transformed into ElectroMAX  
433 DH10B *E. coli* (Invitrogen). Single colonies for each point mutant were Miniprepped (Qiagen) and  
434 sequence-verified using either 5'- GCCATGAACAAGTCCGAACGCGTGGAA -3' or 5'-  
435 GCGATATTTGTTCAACGGGTGTTGAGCAAT -3'.

436 To generate parasite lines complemented with the catalytically inactive *ROP17*, *RHΔrop17*  
437 parasites were transfected with the pGRA1-*ROP17\_K312A\_-3xHA*, pGRA1-*ROP 17\_D436A\_-3xHA*, or  
438 pGRA1-*ROP17\_D454A\_-3xHA* plasmid then subsequently selected for 6 days with MPA/XAN and  
439 single cloned as previously described.

#### 440 **Coinfection Assays**

441 Condition 1. Confluent HFF coverslips were infected with *RHΔrop17* parasites stably  
442 expressing *GRA24-3xMYC* at an MOI of 0.15. They were then pulsed at 1400 rpm and placed at 37°C  
443 and 5% CO<sub>2</sub> for 1 hour. Thereafter, the same sample was infected with *RHΔmyr1* constitutively  
444 expressing *mCherry* at a MOI of 0.15, pulsed at 1400 rpm and placed at 37°C and 5% CO<sub>2</sub>.  
445 Infections were allowed to progress to 17-18 hours. Condition 2 was performed in the same way  
446 except the order of addition of the two strains to the host cells was reversed.

#### 447 **RNA extraction, library preparation, and sequencing**

448 HFFs were serum-starved for 24 hours before infection by growth in DMEM containing 0.5%  
449 serum. They were then infected with the indicated line of tachyzoites at an MOI of 5, and at 6 hpi, 1  
450 ml TRIzol reagent (Invitrogen) was added to each T25 and the cells were scraped. Lysates were  
451 collected and frozen at -20 °C. Total RNA was extracted following the manufacturer's instructions,  
452 with some modifications. Briefly: frozen samples were thawed on ice and 0.2 ml chloroform was  
453 added to TRIzol suspensions, which were then mixed by inverting 10 times, and incubated for 5  
454 min. Tubes were then spun at 12,000 rpm for 15 min at 4 °C. RNA in the aqueous phase was  
455 transferred into a fresh tube and 0.5 ml absolute isopropyl alcohol was added and incubated at 4 °C  
456 for 10 min. They were then spun at 12,000 rpm for 20 min at 4 °C. After decanting the supernatants,  
457 RNA pellets were washed with 1 ml 75% ethanol and then spun at 12,000 rpm for 20 min at 4 °C.  
458 Supernatants were removed and the RNA pellets were resuspended in 30 μl RNase-free DEPC-  
459 water. RNA samples were submitted to the Stanford University Functional Genomic Facility (SFGF)

460 for purity analysis using the Agilent 2100 Bioanalyzer. Multiplex sequencing libraries were  
461 generated with RNA Sample Prep Kit (Illumina) according to manufacturer's instructions and  
462 pooled for a single high-throughput sequencing run using the Illumina NextSeq platform (Illumina  
463 Nextseq 500 model instrument).

#### 464 **RNASeq read mapping and differential expression analysis**

465 Raw reads were uploaded onto the CLC Genomics Workbench 8.0 (Qiagen) platform for  
466 independent alignments against the human genomes (Ensembl.org/ hg19) and *Toxoplasma* Type I  
467 GT1 strain (ToxoDB-24, GT1 genome). All parameters were left at their default values. The number  
468 of total reads mapped to each genome was used to determine the RPKM (Reads Per Kilobase of  
469 transcript per Million mapped reads). Among these genes, only those with an average RPKM ratios  
470  $\geq 2.5$  were counted as changed in expression.

#### 471 **Gene Set Enrichment Analysis (GSEA)**

472 GSEA, available through the Broad Institute at  
473 <http://www.broadinstitute.org/gsea/index.jsp>, was the enrichment analysis software we used to  
474 determine whether defined sets of differentially expressed human genes in our experiment show  
475 statistically significant overlap with gene sets in the curated Molecular Signatures Databases  
476 (MsigDB) Hallmark gene set collection. We used the cutoff of FDR q-value  $< 10^{-5}$ .

#### 477 **PCA Analysis**

478 To generate PCA (principle component analysis) we used <https://biit.cs.ut.ee/clustvis/#tab-9298-7>  
479 online tool. We used the RPKM values of all expressed genes to generate the PCA.

#### 480 **Statistical Analyses**

481 Statistical analysis was performed with Prism version 8 software. For intensity analysis,  
482 GRA24MYC translocation was assessed by ImageJ and then differences in intensity were analyzed  
483 by one way ANOVA with a post hoc Tukey's test. Similarly, differences in the number of infected

484 host cells with nuclei staining positive for GRA24 translocation or c-Myc expression were compared  
485 using a one way ANOVA with a post hoc Tukey's test.

#### 486 **Accession number**

487 The RNASeq data files have been deposited in GEO under accession number GSExxxxx  
488 (number available at time of publish). Data presented as transcriptomics control data, for HFFs  
489 uninfected and those infected by RH and RH $\Delta$ *myr1* tachyzoites, have been published under  
490 GSE122786 (Panas et al., 2019, manuscript in press at mBio).

491

#### 492 **Acknowledgments**

493 We thank all members of our laboratory for helpful comments and input to the experiments  
494 and manuscript and Melanie Espiritu for help with tissue culture and ordering. We also thank Dr.  
495 Michael Reese (UT Southwestern) for help positioning the missense point mutation in the ROP17  
496 secondary structure.

497

#### 498 **Funding**

499 This project has been funded in whole or part with: federal funds from the National Institute of  
500 Allergy and Infectious Diseases, National Institutes of Health, Department of Health and Human Services  
501 under Award Numbers NIH RO1-AI21423 (JCB), NIH RO1-AI129529 (JCB), NIH U19AI110819  
502 (HAL); 5T32AI007328-30 to AF; NIH/Office of the Director "Research opportunities in comparative  
503 medicine" T35 grant OD010989 to LT; Gillian Fellowship HHMI to AF, and the Human Frontier  
504 Science Program (LT000404/2014-L) to AN.

505

506 **Figure 1.** MFM1.15 shows a partial Myr<sup>-</sup> phenotype and has a mutation in *ROP17*. **A.** Representative  
507 immunofluorescence assay (IFA) images of HFFs infected with RH-wild type, RH $\Delta$ *myr1* or RH

508 mutant MFM1.15. All three parasite strains express cytosolic td-tomato (red) and were transfected  
509 with a plasmid expressing HA-tagged GRA16 which was detected by probing with anti-HA (green).  
510 Hollow arrows indicate vacuoles containing parasites expressing the GRA16HA transgene. Solid  
511 arrows indicate the nuclei in cells containing such vacuoles. Only the RH-WT-infected cells show  
512 efficient translocation of GRA16HA to the host cell nucleus. One of three biological replicates is  
513 shown. **B.** Translocation of GRA24 to the nucleus is also disrupted in mutant MFM1.15.  
514 Quantitation of nuclear GRA24MYC was assessed by anti-MYC tag staining followed by ImageJ to  
515 determine the intensity of nuclear staining in transiently transfected parasites from at least 10  
516 random fields. The MFM1.15 mutant shows a significantly reduced nuclear signal but still more  
517 than the essentially complete lack of signal in the RH $\Delta$ *myr1* mutant. Error bars indicate standard  
518 error of the mean. \*:  $p < 0.05$ , \*\*:  $p < 0.0001$ . One of two biological replicates is shown. **C.** Mutations  
519 identified by whole genome sequencing of mutant MFM1.15 and the sub-clone MFM2.1b. Coverage  
520 is the number of reads spanning the indicated nucleotide and Variant Freq. is the fraction of reads  
521 showing the variant nucleotide relative to reference (GT1). Both mutants show mutations relative  
522 to the annotated Type I strain, GT1, in *TGGT1\_258580* (*ROP17*) with a missense mutation in  
523 MFM1.15 and a nonsense mutation in MFM2.1b.

524

525 **Figure 2.** Deletion of *ROP17* generates a mutant parasite that cannot export GRA16 or GRA24 from  
526 the parasitophorous vacuole. **A.** Strategy for generating a disruption in *ROP17*. Plasmid pTKO2  
527 containing HXGPRT (conferring resistance to mycophenolic acid in an otherwise  $\Delta$ *hxgpirt* strain)  
528 was integrated into a cleavage site generated by Cas9 in the beginning of the *ROP17* open reading  
529 frame. Positions of the primers F and R that were used for detection of the insertion are shown. **B.**  
530 PCR data showing results of amplification with primers F and R of panel A. The wild-type locus  
531 yields a band of ~2275 bp whereas insertion of the knock-out plasmid yields a band of ~6000 bp. **C.**



532 IFA of HFFs infected with RH-WT or RH $\Delta$ *rop17* that had also been transiently transfected with  
533 GRA16HA (left) or GRA24MYC (right) and then stained with anti-HA (red, left), or anti-Myc tag (red,  
534 right) and DAPI (blue) to reveal the nuclei. Hollow arrows indicate parasitophorous vacuoles; solid  
535 arrows indicate the nuclei in such cells. Translocation of GRA16 and GRA24 to the host nucleus is  
536 seen in cells infected with RH-WT but not RH $\Delta$ *rop17* parasites (quantitation of similar such  
537 experiments is shown in Fig. 5).

538

539 **Figure 3.** A wild-type copy of *ROP17* rescues the Myr<sup>-</sup> phenotype of the  $\Delta$ *rop17* mutant. **A.** Strategy  
540 for complementing the  $\Delta$ *rop17* mutants with a 3xHA-tagged wild type copy of *ROP17*. **B.** IFA  
541 showing successful complementation of the  $\Delta$ *rop17* mutant with a HA-tagged wild-type copy of the  
542 gene. Green shows staining with anti-ROP2/3/4 as a marker for rhoptries; red shows staining for  
543 the complementing ROP17-HA. **C.** IFA of HFFs infected with RH-WT, RH $\Delta$ *rop17* or  
544 RH $\Delta$ *rop17::ROP17-3xHA*. Anti-HA antibody was used to detect the complementing ROP17 (green)  
545 while red was used for staining of host c-Myc as an indicator of successful effector translocation,  
546 and blue shows DAPI staining of the host nuclei. Hollow arrows indicate parasitophorous vacuoles;  
547 solid arrows indicate the host nuclei in infected cells (quantitation of similar such experiments is  
548 shown in Fig. 5).

549

550 **Figure 4.** Creation of three strains of RH $\Delta$ *rop17* containing point mutations in key catalytic  
551 residues. **A.** Three different plasmids were created for the expression of point mutant variants of  
552 ROP17; each expresses a *ROP17* transgene encoding an alanine substitution at one of the three  
553 predicted catalytic residues: K312, D436 and D454. **B.** IFA of infected HFFs showing correct  
554 trafficking of the mutated ROP17 expressed in an RH $\Delta$ *rop17* background. Anti-HA (red) detects the  
555 ROP17 transgene product while anti-ROP2/3/4 (green) detects other known rhoptry proteins. **C.**

556 IFA of HFFs that were infected with the strains expressing the indicated HA-tagged version of  
557 ROP17 (WT, K312A, D436A or D454A), partially permeabilized by treatment with 0.02% digitonin,  
558 and then stained for ROP17-3xHA using anti-HA (red) or anti-SAG1 (green). The absence of SAG1  
559 staining was used to indicate that the parasitophorous vacuole was not permeabilized indicating  
560 partial permeabilization that allows antibodies to access the host cytosol but not penetrate the  
561 PVM. ROP17 is detected at the PVM in cells that are only partially permeabilized indicating the  
562 expected cytosolic exposure of the protein. A positive control of an infected cell that was fully  
563 permeabilized under these conditions is shown to confirm the anti-SAG1 staining is readily seen in  
564 such cells.

565

566 **Figure 5.** ROP17 catalytic activity appears necessary for its role in effector translocation. **A.** HFFs  
567 were infected with the indicated strains transiently expressing GRA24MYC and then 17-18 hours  
568 later the presence of GRA24MYC in the nucleus of cells infected with GRA24MYC-expressing  
569 parasites was assessed by IFA. The results are from assessment of a minimum of 94 cells and the  
570 standard error of the mean is shown. The experiment was done in biological duplicate for RH,  
571  $RH\Delta rop17$  and  $RH\Delta rop17::ROP17$  and similar results were obtained in both. Catalytically inactive  
572 mutants were done in technical triplicate. **B.** Assessment of the effect of mutating ROP17 on host c-  
573 Myc upregulation upon infection. HFFs were infected with the indicated strain and then 20 hours  
574 later, c-Myc expression in the nucleus of infected cells was assessed using IFA and anti-c-Myc  
575 antibodies (red). Expression of the variants of ROP17-3xHA was assessed by staining with anti-HA  
576 (green). None of the three catalytic mutants rescued the Myr- phenotype of the  $\Delta rop17$  mutant.  
577 Differences were assessed by ANOVA with a post hoc Tukey's test. \*\*:  $p < 0.0001$ . **C.** Quantification of  
578 cells upregulating host c-Myc. At least 110 random fields were quantified from the slides used to  
579 produce the images shown in panel B, scoring for percentage of host nuclei in infected cells that

580 show host c-Myc upregulation. Differences were assessed by ANOVA with a post hoc Tukey's test.  
581 \*\*:  $p < 0.0001$ .

582

583 **Figure 6.** ROP17's role in effector translocation occurs at the host-cytosolic side of the PVM. **A.**  
584 Conditions used for co-infection of host cells with RH $\Delta$ *rop17::GRA24MYC* and RH $\Delta$ *myr1* expressing  
585 mCherry. Infections were initiated with the indicated strain followed by addition of the second  
586 strain one hour later followed by IFA after a further 17 hours. **B.** Quantitation of the percentage of  
587 host nuclei staining positive for GRA24MYC in the cells infected with the indicated strains. Cells  
588 infected with one or other of the two mutants showed no GRA24MYC whereas those that were co-  
589 infected with both mutants showed substantial rescue in "trans." Differences were assessed by  
590 ANOVA with a post hoc Tukey's test. \*\*:  $p < 0.001$ .

591

592 **Figure 7.** Disrupting *MYR1* or *ROP17* have congruent impacts on the infected host cell's  
593 transcriptome as assessed by RNASeq. **A.** Principal component analysis (PCA) of the RPKM values of  
594 HFFs mock-infected or infected with RH-WT (wild type), RH $\Delta$ *myr1*, or RH $\Delta$ *rop17* tachyzoites. On a  
595 plot of PC1 and PC2, there is close similarity of the data for cells infected with the two mutants,  
596 RH $\Delta$ *myr1* and RH $\Delta$ *rop17*, relative to the mock- or RH-WT-infected cells. Gene names and RPKMs  
597 can be found in Supplemental table S1. **B.** Gene-set expression analysis (GSEA) of all genes  
598 expressed 2.5-fold higher in RH than in RH $\Delta$ *myr1* (green) or RH $\Delta$ *rop17* (purple), where either was  
599 lower than the FDR q-value threshold of  $10^{-5}$ . The gene sets are ordered based on descending levels  
600 of significance (ascending q-values) for the cells infected with RH $\Delta$ *myr1*. **C.** As in B, except GSEA was  
601 performed on the genes that were expressed 2.5-fold lower in RH compared to RH $\Delta$ *myr1* and  
602 RH $\Delta$ *rop17* by the same criteria.

603

604 Supplemental Table S1. List of the RPKM values of HFF infected with the respective strains.

605

606

607 1. Carruthers VB, Sibley LD (1997) Sequential protein secretion from three distinct organelles of

608 *Toxoplasma gondii* accompanies invasion of human fibroblasts. Eur J Cell Biol 73: 114-123.

609 2. Hakansson S, Carruthers V, Heuser J, Sibley D (1997) A putative role for MIC2 in gliding motility

610 of *Toxoplasma gondii*. Molecular Parasitology Meeting VIII, MBL Woods Hole, MA: 421.

611 3. Soldati D, Dubremetz JF, Lebrun M (2001) Microneme proteins: structural and functional

612 requirements to promote adhesion and invasion by the apicomplexan parasite *Toxoplasma*

613 *gondii*. Int J Parasitol 31: 1293-1302.

614 4. Boothroyd JC, Dubremetz JF (2008) Kiss and spit: the dual roles of *Toxoplasma* rhoptries. Nat Rev

615 Microbiol 6: 79-88.

616 5. Tyler JS, Boothroyd JC (2011) The C-terminus of *Toxoplasma* RON2 provides the crucial link

617 between AMA1 and the host-associated invasion complex. PLoS Pathog 7: e1001282.

618 6. Lamarque M, Besteiro S, Papoin J, Roques M, Vulliez-Le Normand B, et al. (2011) The RON2-

619 AMA1 interaction is a critical step in moving junction-dependent invasion by apicomplexan

620 parasites. PLoS Pathog 7: e1001276.

621 7. Tonkin ML, Roques M, Lamarque MH, Pugniere M, Douguet D, et al. (2011) Host cell invasion by

622 apicomplexan parasites: insights from the co-structure of AMA1 with a RON2 peptide.

623 Science 333: 463-467.

624 8. Kimata I, Tanabe K (1987) Secretion by *Toxoplasma gondii* of an antigen that appears to become

625 associated with the parasitophorous vacuole membrane upon invasion of the host cell. J Cell

626 Sci 88 ( Pt 2): 231-239.

- 627 9. Dubremetz JF (2007) Rhoptries are major players in *Toxoplasma gondii* invasion and host cell  
628 interaction. *Cell Microbiol* 9: 841-848.
- 629 10. Bradley PJ, Sibley LD (2007) Rhoptries: an arsenal of secreted virulence factors. *Curr Opin*  
630 *Microbiol* 10: 582-587.
- 631 11. Hakimi MA, Olias P, Sibley LD (2017) *Toxoplasma* Effectors Targeting Host Signaling and  
632 Transcription. *Clin Microbiol Rev* 30: 615-645.
- 633 12. Kemp LE, Yamamoto M, Soldati-Favre D (2013) Subversion of host cellular functions by the  
634 apicomplexan parasites. *FEMS Microbiol Rev* 37: 607-631.
- 635 13. El Hajj H, Demey E, Poncet J, Lebrun M, Wu B, et al. (2006) The ROP2 family of *Toxoplasma*  
636 *gondii* rhoptry proteins: proteomic and genomic characterization and molecular modeling.  
637 *Proteomics* 6: 5773-5784.
- 638 14. Zhao Y, Ferguson DJ, Wilson DC, Howard JC, Sibley LD, et al. (2009) Virulent *Toxoplasma gondii*  
639 evade immunity-related GTPase-mediated parasite vacuole disruption within primed  
640 macrophages. *J Immunol* 182: 3775-3781.
- 641 15. Fentress SJ, Behnke MS, Dunay IR, Mashayekhi M, Rommereim LM, et al. (2010)  
642 Phosphorylation of immunity-related GTPases by a *Toxoplasma gondii*-secreted kinase  
643 promotes macrophage survival and virulence. *Cell Host Microbe* 8: 484-495.
- 644 16. Steinfeldt T, Konen-Waisman S, Tong L, Pawlowski N, Lamkemeyer T, et al. (2010)  
645 Phosphorylation of mouse immunity-related GTPase (IRG) resistance proteins is an evasion  
646 strategy for virulent *Toxoplasma gondii*. *PLoS Biol* 8: e1000576.
- 647 17. Howard JC, Hunn JP, Steinfeldt T (2011) The IRG protein-based resistance mechanism in mice  
648 and its relation to virulence in *Toxoplasma gondii*. *Curr Opin Microbiol* 14: 414-421.

- 649 18. Behnke MS, Fentress SJ, Mashayekhi M, Li LX, Taylor GA, et al. (2012) The polymorphic  
650 pseudokinase ROP5 controls virulence in *Toxoplasma gondii* by regulating the active kinase  
651 ROP18. PLoS Pathog 8: e1002992.
- 652 19. Fleckenstein MC, Reese ML, Konen-Waisman S, Boothroyd JC, Howard JC, et al. (2012) A  
653 *Toxoplasma gondii* pseudokinase inhibits host IRG resistance proteins. PLoS Biol 10:  
654 e1001358.
- 655 20. Niedelman W, Gold DA, Rosowski EE, Sprokholt JK, Lim D, et al. (2012) The rhoptry proteins  
656 ROP18 and ROP5 mediate *Toxoplasma gondii* evasion of the murine, but not the human,  
657 interferon-gamma response. PLoS Pathog 8: e1002784.
- 658 21. Etheridge RD, Alaganan A, Tang K, Lou HJ, Turk BE, et al. (2014) The *Toxoplasma* pseudokinase  
659 ROP5 forms complexes with ROP18 and ROP17 kinases that synergize to control acute  
660 virulence in mice. Cell Host Microbe 15: 537-550.
- 661 22. Sadak A, Taghy Z, Fortier B, Dubremetz JF (1988) Characterization of a family of rhoptry  
662 proteins of *Toxoplasma gondii*. Mol Biochem Parasitol 29: 203-211.
- 663 23. Beckers CJM, Dubremetz JF, Mercereau-Puijalon O, Joiner KA (1994) The *Toxoplasma gondii*  
664 rhoptry protein ROP2 is inserted into the parasitophorous vacuole membrane, surrounding  
665 the intracellular parasite, and is exposed to the host cell cytoplasm. J Cell Biol 127: 947-961.
- 666 24. El Hajj H, Lebrun M, Fourmaux MN, Vial H, Dubremetz JF (2007) Inverted topology of the  
667 *Toxoplasma gondii* ROP5 rhoptry protein provides new insights into the association of the  
668 ROP2 protein family with the parasitophorous vacuole membrane. Cell Microbiol 9: 54-64.
- 669 25. Li JX, He JJ, Elsheikha HM, Chen D, Zhai BT, et al. (2019) *Toxoplasma gondii* ROP17 inhibits the  
670 innate immune response of HEK293T cells to promote its survival. Parasitol Res.

- 671 26. Fox BA, Sanders KL, Rommereim LM, Guevara RB, Bzik DJ (2016) Secretion of Rhoptry and  
672 Dense Granule Effector Proteins by Nonreplicating *Toxoplasma gondii* Uracil Auxotrophs  
673 Controls the Development of Antitumor Immunity. PLoS Genet 12: e1006189.
- 674 27. Cesbron-Delauw MF, Lecordier L, Mercier C (1996) Role of secretory dense granule organelles  
675 in the pathogenesis of *Toxoplasmosis*. Curr Top Microbiol Immunol 219: 59-65.
- 676 28. Charif H, Darcy F, Torpier G, Cesbron-Delauw MF, Capron A (1990) *Toxoplasma gondii*:  
677 characterization and localization of antigens secreted from tachyzoites. Exp Parasitol 71:  
678 114-124.
- 679 29. Leriche MA, Dubremetz JF (1990) Exocytosis of *Toxoplasma gondii* dense granules into the  
680 parasitophorous vacuole after host cell invasion. Parasitol Res 76: 559-562.
- 681 30. Dubremetz JF, Achbarou A, Bermudes D, Joiner KA (1993) Kinetics and pattern of organelle  
682 exocytosis during *Toxoplasma gondii*/host-cell interaction. Parasitol Res 79: 402-408.
- 683 31. Mercier C, Cesbron-Delauw MF, Sibley LD (1998) The amphipathic alpha helices of the  
684 toxoplasma protein GRA2 mediate post-secretory membrane association. J Cell Sci 111:  
685 2171-2180.
- 686 32. Mercier C, Howe DK, Mordue D, Lingnau M, Sibley LD (1998) Targeted disruption of the GRA2  
687 locus in *Toxoplasma gondii* decreases acute virulence in mice. Infect Immun 66: 4176-4182.
- 688 33. Pernas L, Adomako-Ankomah Y, Shastri AJ, Ewald SE, Treeck M, et al. (2014) *Toxoplasma*  
689 effector MAF1 mediates recruitment of host mitochondria and impacts the host response.  
690 PLoS Biol 12: e1001845.
- 691 34. Rosowski EE, Lu D, Julien L, Rodda L, Gaiser RA, et al. (2011) Strain-specific activation of the NF-  
692 kappaB pathway by GRA15, a novel *Toxoplasma gondii* dense granule protein. J Exp Med  
693 208: 195-212.

- 694 35. Hakimi MA, Bougdour A (2015) *Toxoplasma's* ways of manipulating the host transcriptome via  
695 secreted effectors. *Curr Opin Microbiol* 26: 24-31.
- 696 36. Bougdour A, Durandau E, Brenier-Pinchart MP, Ortet P, Barakat M, et al. (2013) Host cell  
697 subversion by *Toxoplasma* GRA16, an exported dense granule protein that targets the host  
698 cell nucleus and alters gene expression. *Cell Host Microbe* 13: 489-500.
- 699 37. Bougdour A, Tardieux I, Hakimi MA (2014) *Toxoplasma* exports dense granule proteins beyond  
700 the vacuole to the host cell nucleus and rewires the host genome expression. *Cell Microbiol*  
701 16: 334-343.
- 702 38. Gay G, Braun L, Brenier-Pinchart MP, Vollaire J, Josserand V, et al. (2016) *Toxoplasma gondii*  
703 TglST co-opts host chromatin repressors dampening STAT1-dependent gene regulation and  
704 IFN-gamma-mediated host defenses. *J Exp Med* 213: 1779-1798.
- 705 39. Olias P, Etheridge RD, Zhang Y, Holtzman MJ, Sibley LD (2016) *Toxoplasma* Effector Recruits the  
706 Mi-2/NuRD Complex to Repress STAT1 Transcription and Block IFN-gamma-Dependent  
707 Gene Expression. *Cell Host Microbe* 20: 72-82.
- 708 40. He H, Brenier-Pinchart MP, Braun L, Kraut A, Touquet B, et al. (2018) Characterization of a  
709 *Toxoplasma* effector uncovers an alternative GSK3/beta-catenin-regulatory pathway of  
710 inflammation. *Elife* 7.
- 711 41. Naor A, Panas MW, Marino N, Coffey MJ, Tonkin CJ, et al. (2018) MYR1-Dependent Effectors Are  
712 the Major Drivers of a Host Cell's Early Response to *Toxoplasma*, Including Counteracting  
713 MYR1-Independent Effects. *MBio* 9.
- 714 42. Franco M, Panas MW, Marino ND, Lee MC, Buchholz KR, et al. (2016) A Novel Secreted Protein,  
715 MYR1, Is Central to *Toxoplasma's* Manipulation of Host Cells. *MBio* 7: e02231-02215.



- 716 43. Marino ND, Panas MW, Franco M, Theisen TC, Naor A, et al. (2018) Identification of a novel  
717 protein complex essential for effector translocation across the parasitophorous vacuole  
718 membrane of *Toxoplasma gondii*. PLoS Pathog 14: e1006828.
- 719 44. Qiu W, Wernimont A, Tang K, Taylor S, Lunin V, et al. (2009) Novel structural and regulatory  
720 features of rhoptry secretory kinases in *Toxoplasma gondii*. EMBO J 28: 969-979.
- 721 45. Labesse G, Gelin M, Bessin Y, Lebrun M, Papoin J, et al. (2009) ROP2 from *Toxoplasma gondii*: a  
722 virulence factor with a protein-kinase fold and no enzymatic activity. Structure 17: 139-146.
- 723 46. Peixoto L, Chen F, Harb OS, Davis PH, Beiting DP, et al. (2010) Integrative genomic approaches  
724 highlight a family of parasite-specific kinases that regulate host responses. Cell Host Microbe  
725 8: 208-218.
- 726 47. Dunn JD, Ravindran S, Kim SK, Boothroyd JC (2008) The *Toxoplasma gondii* dense granule  
727 protein GRA7 is phosphorylated upon invasion and forms an unexpected association with  
728 the rhoptry proteins ROP2 and ROP4. Infect Immun 76: 5853-5861.
- 729 48. Hakansson S, Charron AJ, Sibley LD (2001) *Toxoplasma* vacuoles: a two-step process of  
730 secretion and fusion forms the parasitophorous vacuole. EMBO J 20: 3132-3144.
- 731 49. Dou Z, McGovern OL, Di Cristina M, Carruthers VB (2014) *Toxoplasma gondii* ingests and digests  
732 host cytosolic proteins. MBio 5: e01188-01114.
- 733 50. Treeck M, Sanders JL, Elias JE, Boothroyd JC (2011) The phosphoproteomes of *Plasmodium*  
734 *falciparum* and *Toxoplasma gondii* reveal unusual adaptations within and beyond the  
735 parasites' boundaries. Cell Host Microbe 10: 410-419.
- 736 51. Goldszmid RS, Coppens I, Lev A, Caspar P, Mellman I, et al. (2009) Host ER-parasitophorous  
737 vacuole interaction provides a route of entry for antigen cross-presentation in *Toxoplasma*  
738 *gondii*-infected dendritic cells. J Exp Med 206: 399-410.

- 739 52. Yamamoto M, Ma JS, Mueller C, Kamiyama N, Saiga H, et al. (2011) ATF6beta is a host cellular  
740 target of the *Toxoplasma gondii* virulence factor ROP18. *J Exp Med* 208: 1533-1546.
- 741 53. Alexander DL, Mital J, Ward GE, Bradley P, Boothroyd JC (2005) Identification of the moving  
742 junction complex of *Toxoplasma gondii*: a collaboration between distinct secretory  
743 organelles. *PLoS Pathog* 1: e17.
- 744 54. Besteiro S, Michelin A, Poncet J, Dubremetz JF, Lebrun M (2009) Export of a *Toxoplasma gondii*  
745 rhoptry neck protein complex at the host cell membrane to form the moving junction during  
746 invasion. *PLoS Pathog* 5: e1000309.
- 747 55. Fox BA, Ristuccia JG, Gigley JP, Bzik DJ (2009) Efficient gene replacements in *Toxoplasma gondii*  
748 strains deficient for nonhomologous end joining. *Eukaryot Cell* 8: 520-529.
- 749 56. Langmead B, Salzberg SL (2012) Fast gapped-read alignment with Bowtie 2. *Nat Methods* 9:  
750 357-359.
- 751 57. McKenna A, Hanna M, Banks E, Sivachenko A, Cibulskis K, et al. (2010) The Genome Analysis  
752 Toolkit: a MapReduce framework for analyzing next-generation DNA sequencing data.  
753 *Genome Res* 20: 1297-1303.
- 754 58. Li H, Handsaker B, Wysoker A, Fennell T, Ruan J, et al. (2009) The Sequence Alignment/Map  
755 format and SAMtools. *Bioinformatics* 25: 2078-2079.
- 756 59. Cingolani P, Platts A, Wang le L, Coon M, Nguyen T, et al. (2012) A program for annotating and  
757 predicting the effects of single nucleotide polymorphisms, SnpEff: SNPs in the genome of  
758 *Drosophila melanogaster* strain w1118; iso-2; iso-3. *Fly (Austin)* 6: 80-92.
- 759 60. Shen B, Brown KM, Lee TD, Sibley LD (2014) Efficient gene disruption in diverse strains of  
760 *Toxoplasma gondii* using CRISPR/CAS9. *MBio* 5: e01114-01114.
- 761
- 762



Figure 1

**A**

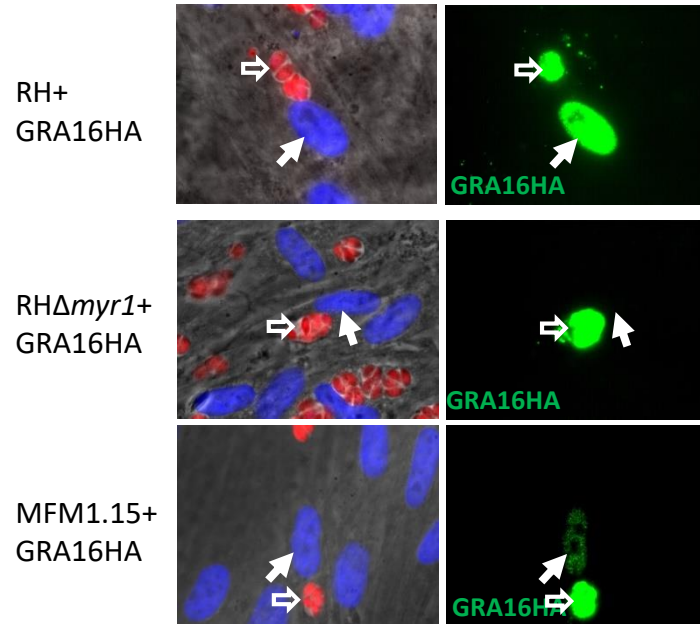

**B**

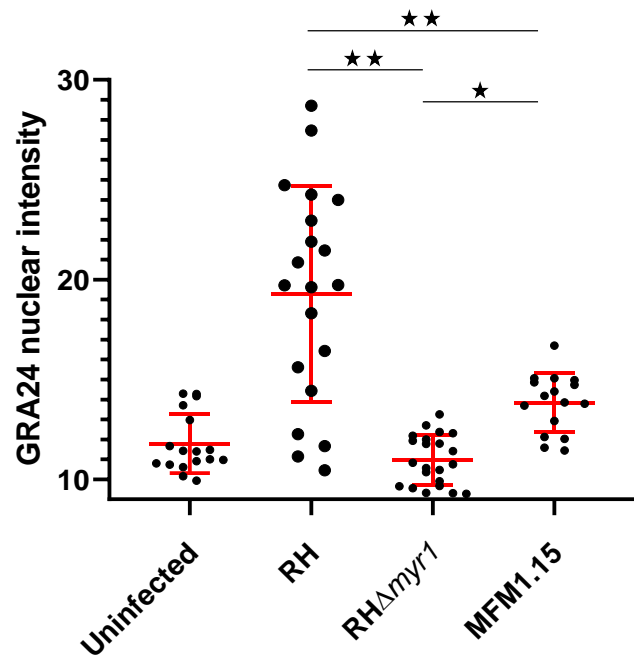

**C**

|               | CHROMOSOME    | POSITION | REFERENCE | VARIANT | COVERAGE | VARIANT FREQ | MUTATION     | GENE ID                       | PRODUCT                                     |
|---------------|---------------|----------|-----------|---------|----------|--------------|--------------|-------------------------------|---------------------------------------------|
| MFM1.15       | TGGT1_chrV    | 892405   | A         | T       | 49       | 1            | p.Phe13Ile   | TGGT1_213420                  | RAP domain-containing protein               |
|               | TGGT1_chrVIIa | 797068   | G         | A       | 50       | 1            | p.Val270Ile  | TGGT1_206580                  | formin FRM2                                 |
|               | TGGT1_chrVIIb | 3288140  | A         | T       | 35       | 0.97         | p.Met350Lys  | TGGT1_258580                  | hoptry protein ROP17                        |
|               | TGGT1_chrVIII | 3378623  | T         | A       | 48       | 1            | p.Leu1402Gln | TGGT1_273580                  | hypothetical protein                        |
|               | TGGT1_chrIX   | 2863127  | C         | T       | 48       | 0.97         | p.Val1133Ile | TGGT1_289190                  | tetratricopeptide repeat-containing protein |
|               | TGGT1_chrIX   | 2961195  | A         | T       | 43       | 1            | p.Ser2Thr    | TGGT1_289290                  | hypothetical protein                        |
|               | TGGT1_chrX    | 6416305  | C         | G       | 51       | 1            | p.Cys1296Trp | TGGT1_214830                  | hypothetical protein                        |
|               | TGGT1_chrXII  | 3209479  | A         | C       | 39       | 0.97         | p.Val125Gly  | TGGT1_247350                  | thioredoxin domain-containing protein       |
|               | TGGT1_chrXII  | 6166035  | G         | A       | 46       | 1            | p.Ser291Phe  | TGGT1_278205                  | hypothetical protein                        |
|               | TGGT1_chrX    | 1938795  | T         | G       | 41       | 1            | p.Val701Gly  | TGGT1_264670                  | DNA polymerase family B protein             |
| TGGT1_chrVIII | 5386411       | T        | C         | 49      | 1        | p.Thr63Ala   | TGGT1_270140 | putative splicing factor DIM1 |                                             |
| MFM2.1b       | TGGT1_chrVIIa | 3223402  | A         | G       | 40       | 1            | p.Ile53Thr   | TGGT1_202445                  | hypothetical protein                        |
|               | TGGT1_chrVIIb | 3288737  | G         | C       | 39       | 1            | p.Ser151*    | TGGT1_258580                  | hoptry protein ROP17                        |
|               | TGGT1_chrX    | 2870406  | T         | C       | 49       | 1            | p.Lys526Glu  | TGGT1_289190                  | tetratricopeptide repeat-containing protein |

Figure 2

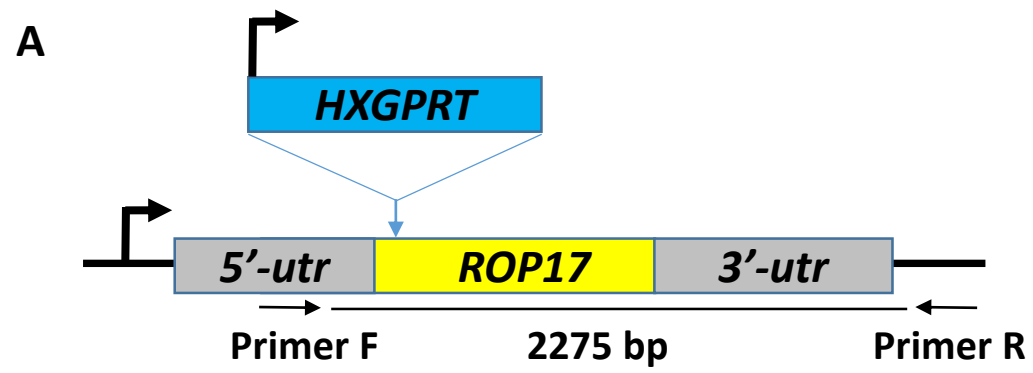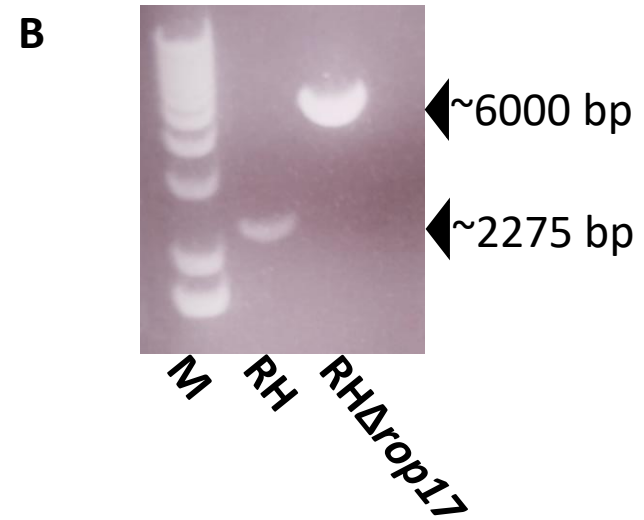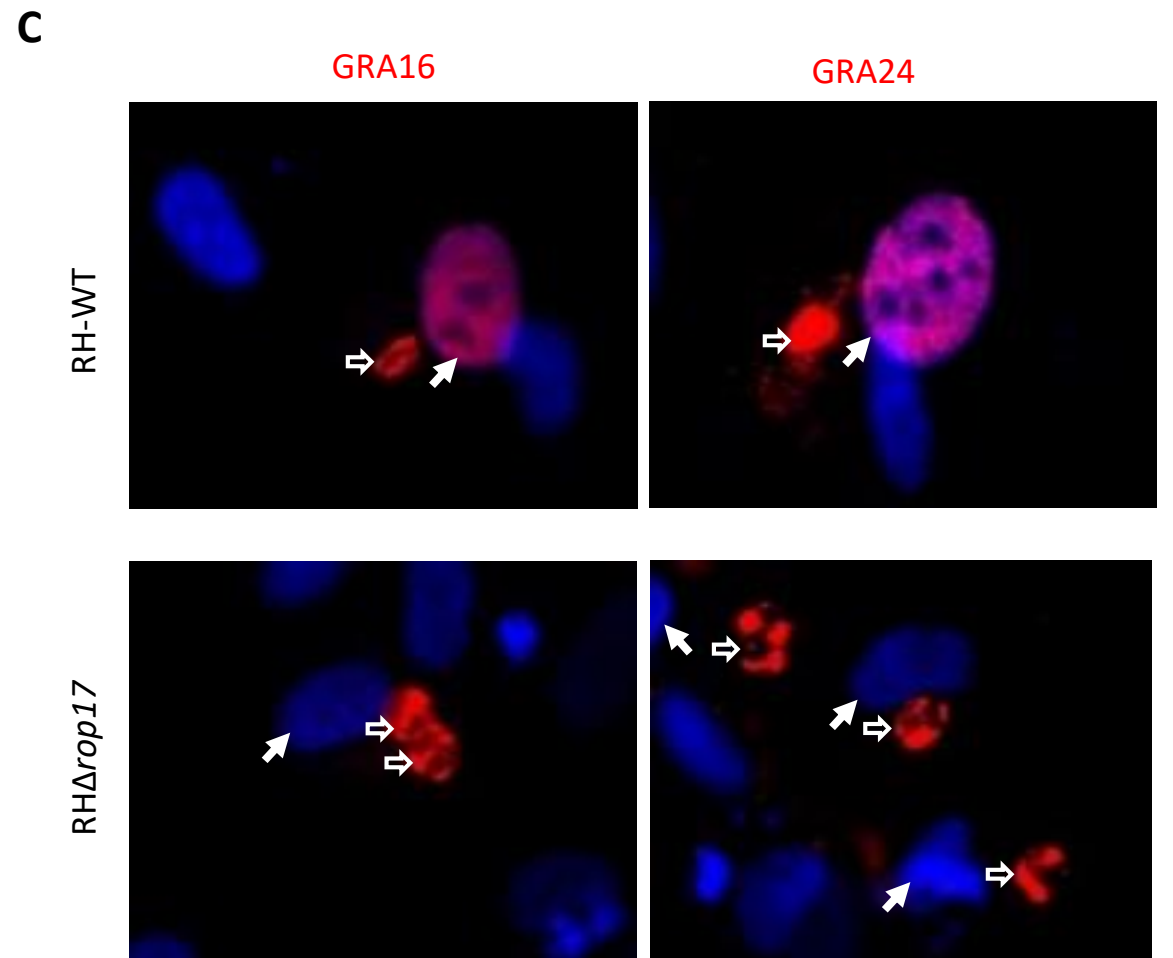

Figure 3

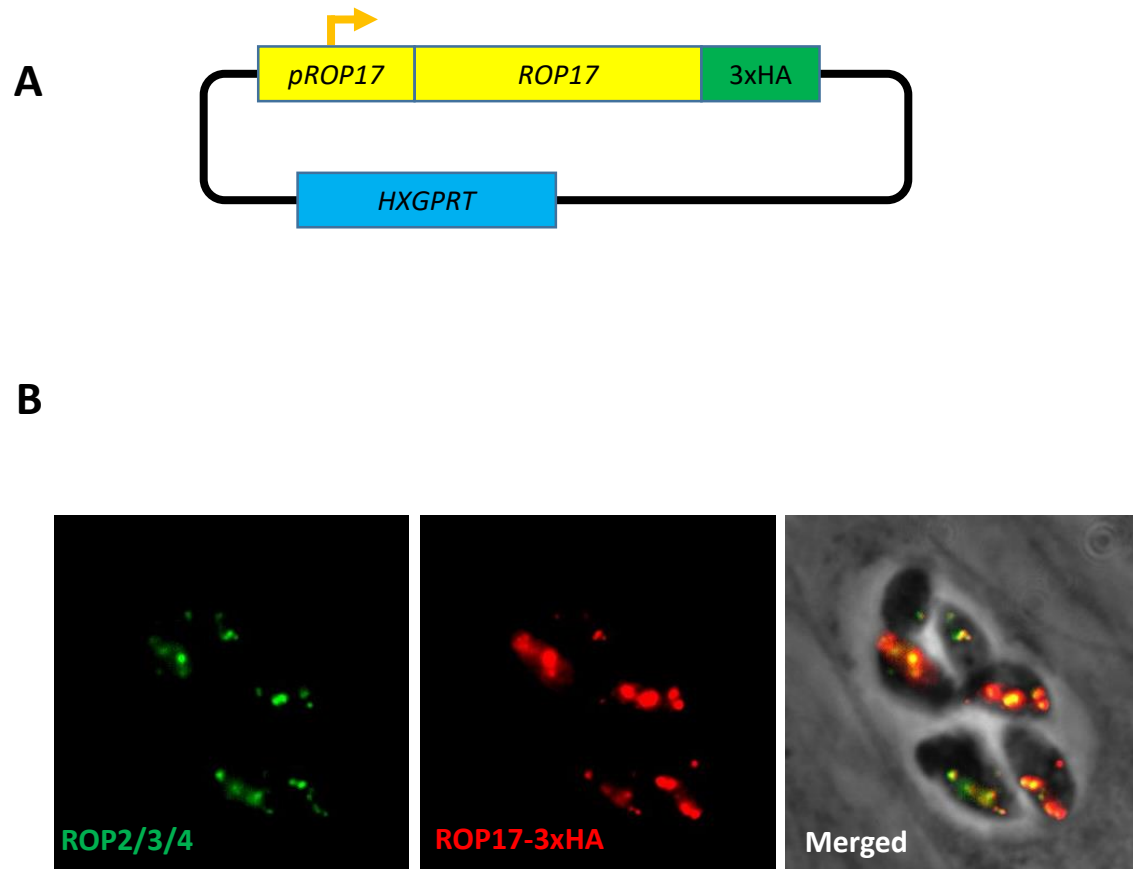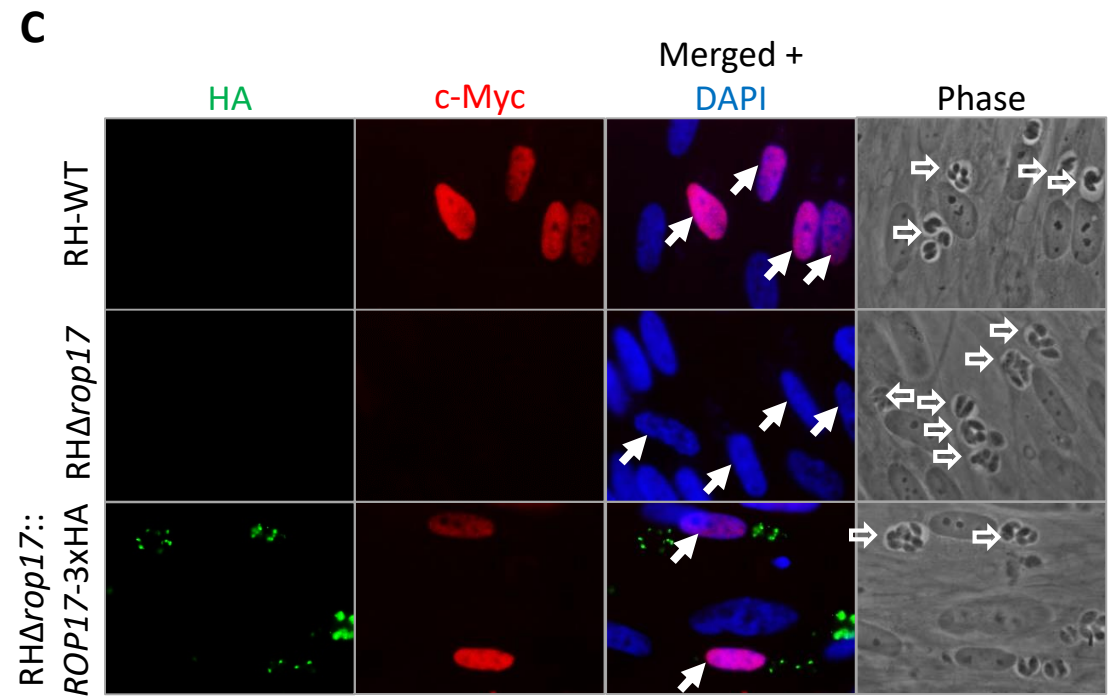

Figure 4

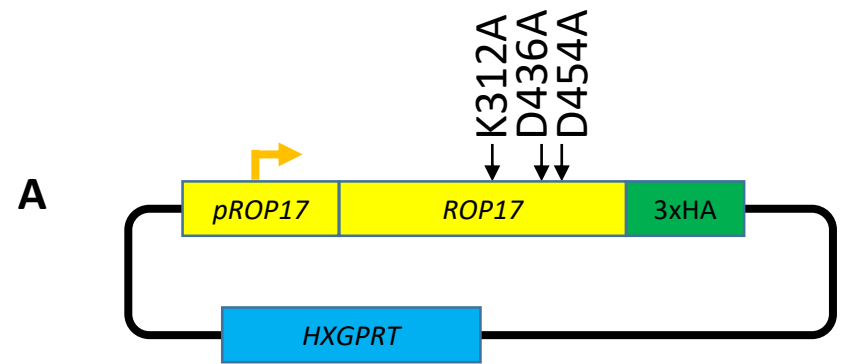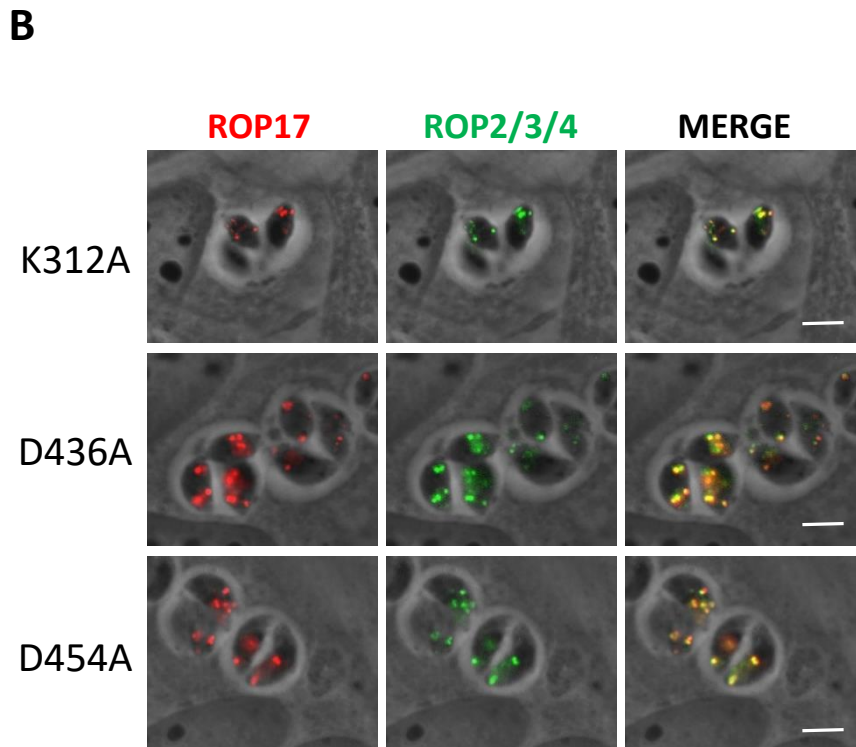

**C**

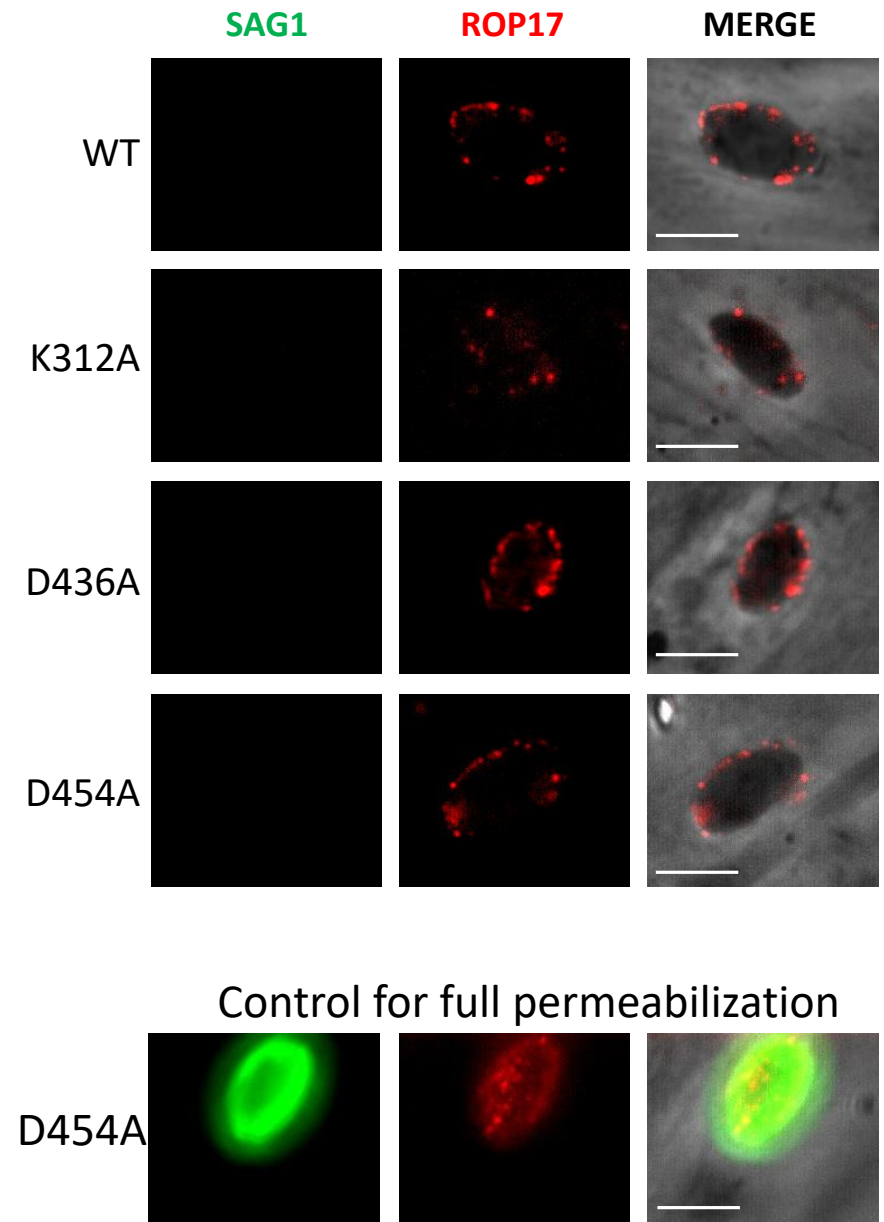

Figure 5

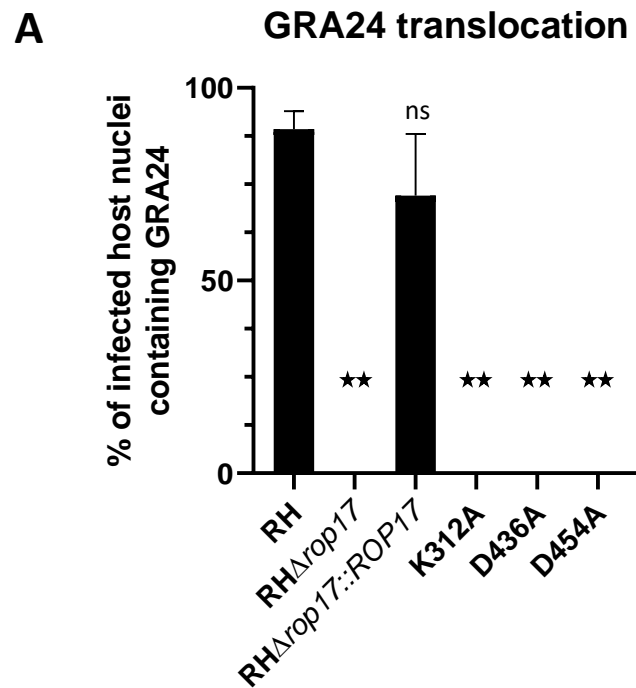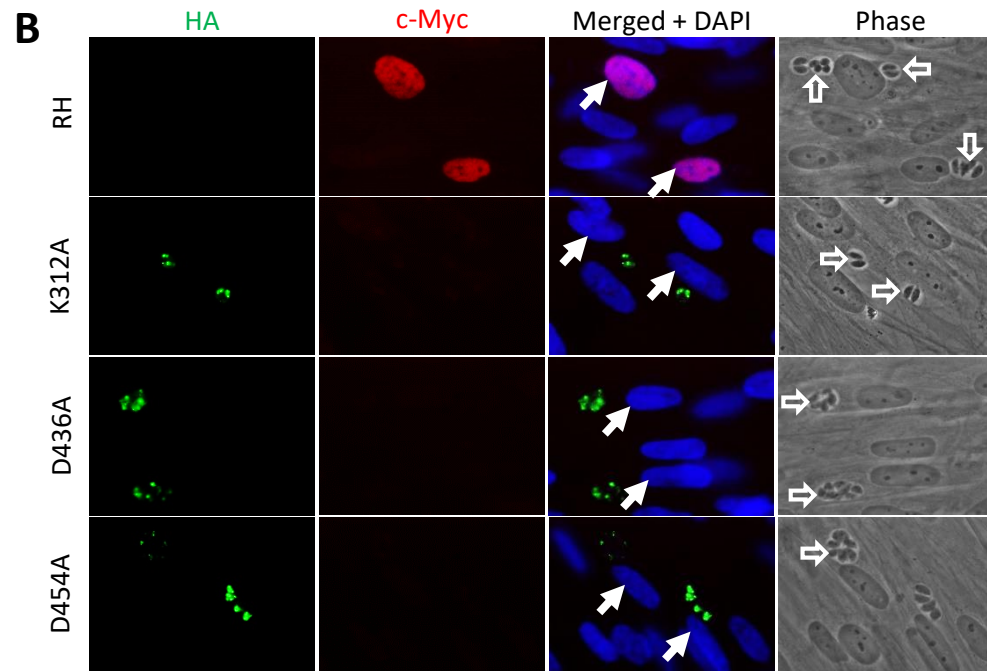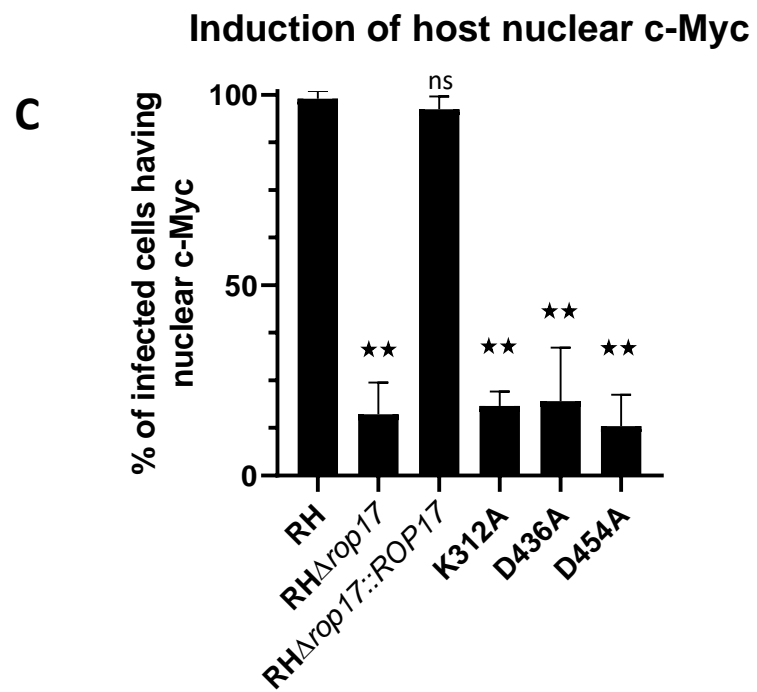



Figure 6

A

| Time  | Condition 1                       | Condition 2                       |
|-------|-----------------------------------|-----------------------------------|
| 0 hr  | RH $\Delta$ <i>rop17</i> GRA24MYC | RH $\Delta$ <i>myr1</i> mCherry   |
| 1 hr  | RH $\Delta$ <i>myr1</i> mCherry   | RH $\Delta$ <i>rop17</i> GRA24MYC |
| 18 hr | fix for IFA                       | fix for IFA                       |

B

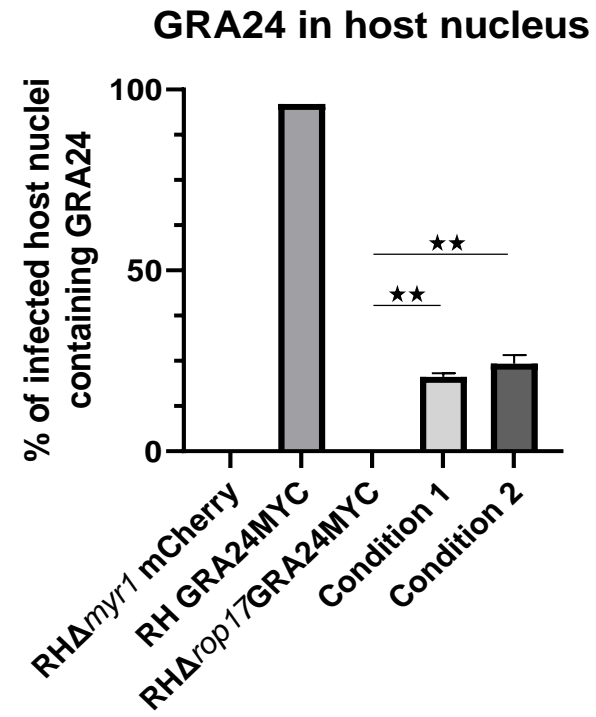

Figure 7

A

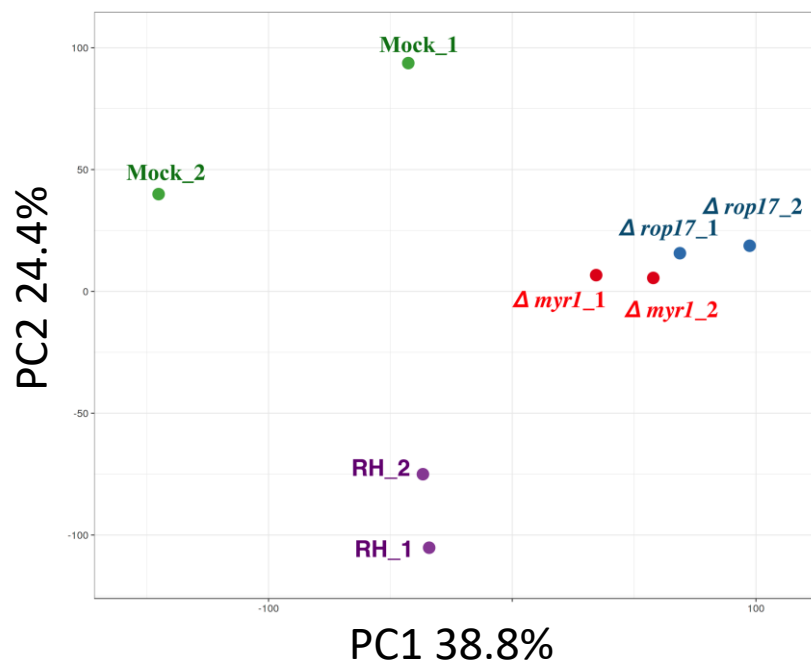

B

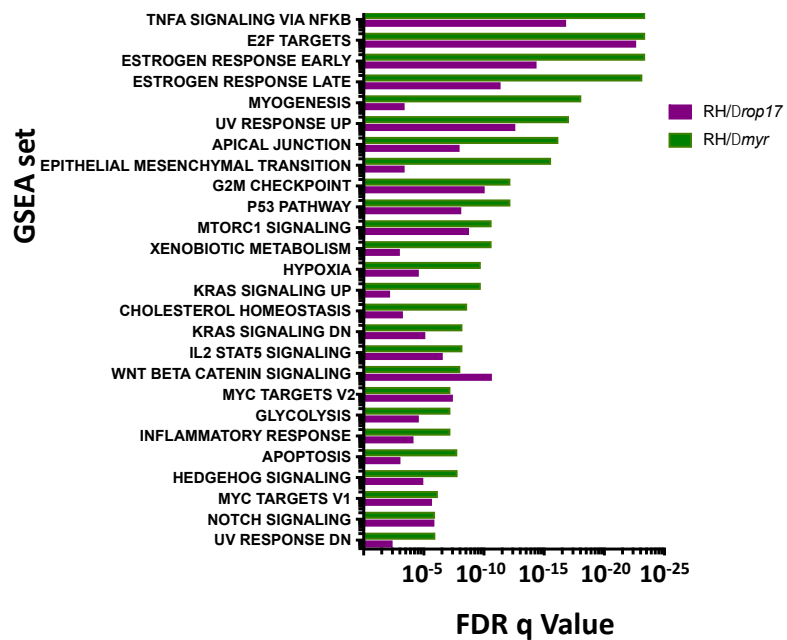

C

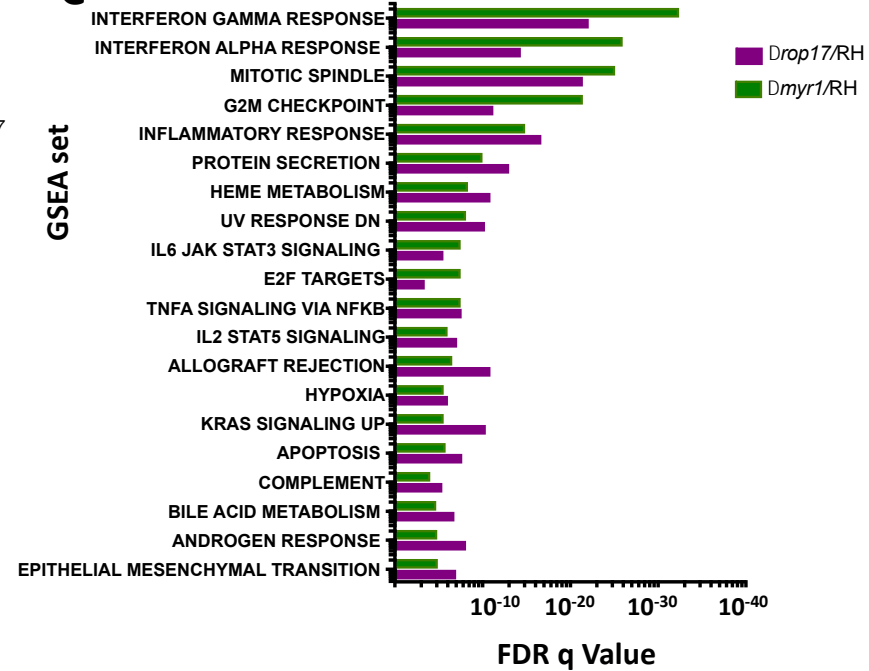

Source: https://www.biorxiv.org/content/biorxiv/early/2019/04/18/613208.full.pdf
